# Supplementary material for: Genetic ablation of Smoothened in pancreatic fibroblasts increases acinar–ductal metaplasia
Source: PubMed Central journal article supplement — Genes Dev. 2016 Sep 1;30(17):1943–55. doi: 10.1101/gad.283499.116 (PMC5066238; doi:10.1101/gad.283499.116), 2016-09-01
Supplement: supp_gad.283499.116_Supplemental_Table_S1.pdf [file supp_gad.283499.116_Supplemental_Table_S1.pdf]

**Table S1:** Microarray data of the top 100 differentially regulated genes (blue down; red up)

| gene_name  | Cont 1 | Cont 2 | Cont 3 | Exp 1 | Exp 2 | Exp 3 |
|------------|--------|--------|--------|-------|-------|-------|
| Clu /// LO | 12.09  | 12.87  | 12.78  | 5.07  | 7.50  | 7.30  |
| ligp1      | 6.41   | 13.53  | 13.57  | 5.65  | 5.54  | 6.15  |
| Ddx3y      | 10.48  | 9.95   | 10.10  | 2.41  | 2.21  | 10.17 |
| Tgtp /// T | 6.10   | 13.59  | 13.65  | 6.23  | 6.61  | 6.80  |
| Eif2s3y    | 9.38   | 9.63   | 9.64   | 2.87  | 3.06  | 9.32  |
| Igtp       | 7.23   | 13.62  | 13.62  | 6.86  | 7.96  | 7.40  |
| Iapp       | 10.49  | 9.99   | 9.25   | 4.05  | 5.39  | 8.29  |
| Dsp        | 8.22   | 7.95   | 7.96   | 3.80  | 4.88  | 4.16  |
| Emcn       | 6.82   | 9.40   | 9.46   | 3.61  | 6.83  | 4.22  |
| Ifi44      | 4.38   | 9.83   | 9.55   | 3.74  | 4.34  | 5.05  |
| B130021B11 | 11.27  | 10.05  | 9.97   | 3.60  | 8.89  | 8.66  |
| Il11       | 9.01   | 10.71  | 10.60  | 4.62  | 7.63  | 7.96  |
| Spint2     | 8.25   | 9.20   | 9.05   | 5.43  | 5.50  | 5.57  |
| Il33       | 7.03   | 8.83   | 9.00   | 3.57  | 5.76  | 5.81  |
| Arg1       | 11.52  | 11.29  | 11.24  | 3.49  | 8.81  | 12.11 |
| Gsn        | 11.35  | 12.13  | 12.05  | 11.14 | 11.47 | 3.39  |
| Chgb       | 9.31   | 8.81   | 8.18   | 4.79  | 5.31  | 6.88  |
| Cldn4      | 8.33   | 8.39   | 8.45   | 5.15  | 5.28  | 5.48  |
| Irgm2      | 6.09   | 11.27  | 11.25  | 5.97  | 6.72  | 6.74  |
| Cxcl10     | 4.80   | 10.23  | 10.10  | 6.25  | 5.01  | 4.79  |
| Pcsk5      | 8.60   | 9.36   | 9.31   | 4.69  | 6.77  | 6.79  |
| Cxcl14     | 10.01  | 10.29  | 10.19  | 3.52  | 8.77  | 9.21  |
| Car8       | 5.20   | 8.11   | 8.21   | 4.31  | 5.25  | 3.06  |
| Aldh1a3    | 9.21   | 9.39   | 9.39   | 4.56  | 8.32  | 6.36  |
| Apoe       | 11.91  | 11.19  | 11.23  | 5.26  | 8.55  | 11.99 |
| Ccl6       | 12.55  | 12.75  | 12.81  | 3.68  | 12.81 | 13.10 |
| Ifit3      | 6.16   | 9.81   | 9.48   | 5.89  | 5.39  | 5.65  |
| Uty        | 7.41   | 7.27   | 7.43   | 3.01  | 3.20  | 7.46  |
| AA467197   | 5.20   | 10.93  | 11.05  | 4.10  | 8.05  | 6.66  |
| Spon1      | 8.73   | 8.08   | 8.03   | 4.15  | 5.88  | 6.47  |
| Heph       | 8.03   | 8.40   | 8.47   | 3.67  | 5.96  | 6.95  |
| Ctss       | 12.21  | 12.23  | 12.32  | 2.95  | 12.66 | 12.93 |
| Cilp       | 6.96   | 7.82   | 7.62   | 4.57  | 4.90  | 4.78  |
| Cpne8      | 7.07   | 8.27   | 8.07   | 4.03  | 3.99  | 7.40  |
| Tfpi2      | 9.63   | 10.99  | 10.88  | 6.53  | 8.86  | 8.12  |
| Gbp2       | 9.58   | 12.62  | 12.58  | 7.63  | 9.76  | 9.53  |
| Mmp12      | 11.94  | 10.43  | 10.55  | 2.86  | 11.06 | 11.13 |
| Gbp3       | 6.49   | 11.13  | 11.13  | 6.28  | 8.00  | 6.75  |
| Stat1      | 6.61   | 10.31  | 10.43  | 6.22  | 6.80  | 6.63  |
| Ccl8       | 8.55   | 11.18  | 11.23  | 6.97  | 7.80  | 8.74  |
| Ppbp       | 5.49   | 9.31   | 9.66   | 3.45  | 9.44  | 4.20  |
| Psmb8      | 7.16   | 11.21  | 11.20  | 5.78  | 8.78  | 7.75  |
| Nrcam      | 8.38   | 9.78   | 9.72   | 4.14  | 8.50  | 8.00  |
| Mgp        | 12.48  | 12.74  | 12.79  | 9.24  | 11.26 | 10.30 |
| Abcb1a     | 7.05   | 8.43   | 8.25   | 3.70  | 6.69  | 6.23  |
| Psmb9      | 5.65   | 10.15  | 9.98   | 4.92  | 7.45  | 6.33  |
| Al256396   | 6.86   | 7.63   | 7.52   | 4.13  | 5.92  | 4.90  |
| BC031748   | 3.59   | 6.77   | 6.74   | 3.57  | 3.42  | 3.18  |
| Decaf1211  | 7.97   | 8.74   | 8.63   | 4.13  | 7.54  | 6.77  |
| Rtp4       | 5.86   | 10.95  | 10.82  | 6.79  | 6.58  | 7.39  |

| gene_name  | Cont 1 | Cont 2 | Cont 3 | Exp 1 | Exp 2 | Exp 3 |
|------------|--------|--------|--------|-------|-------|-------|
| C530008M17 | 6.93   | 5.35   | 5.28   | 6.45  | 7.26  | 7.28  |
| Dtna       | 5.56   | 5.89   | 5.79   | 7.56  | 6.43  | 6.68  |
| Eps8       | 6.27   | 7.11   | 7.26   | 8.85  | 8.13  | 7.13  |
| Kcnab1     | 7.03   | 6.75   | 6.70   | 9.57  | 6.76  | 7.63  |
| Cd34       | 4.89   | 6.52   | 6.54   | 10.69 | 6.52  | 4.26  |
| Gfra2      | 6.04   | 7.40   | 7.22   | 8.79  | 7.29  | 8.16  |
| Mrvi1      | 7.68   | 5.98   | 5.79   | 8.07  | 7.19  | 7.77  |
| Cdkn2a     | 6.74   | 8.36   | 7.70   | 10.15 | 7.83  | 8.43  |
| Tecr       | 7.60   | 7.37   | 7.50   | 9.03  | 8.38  | 8.66  |
| Rpl17      | 8.85   | 7.57   | 7.62   | 9.49  | 9.02  | 9.16  |
| Ang        | 8.15   | 5.72   | 5.33   | 8.56  | 8.65  | 5.64  |
| Dab2       | 7.70   | 7.48   | 7.23   | 8.05  | 9.09  | 8.96  |
| Ifi2712a   | 6.34   | 5.82   | 5.75   | 6.19  | 7.93  | 7.53  |
| Slit3      | 7.08   | 6.76   | 6.80   | 7.28  | 8.10  | 9.00  |
| Prkar2b    | 5.63   | 5.71   | 5.59   | 7.84  | 5.99  | 6.84  |
| Syt12      | 7.93   | 6.99   | 6.94   | 9.36  | 8.34  | 7.97  |
| Lbh        | 7.09   | 6.33   | 6.25   | 7.48  | 8.04  | 8.01  |
| B430203M17 | 7.04   | 6.27   | 6.01   | 8.31  | 7.79  | 7.25  |
| Nrn1       | 5.31   | 7.30   | 7.35   | 11.22 | 7.39  | 5.45  |
| Ldb3       | 7.62   | 5.13   | 5.01   | 7.33  | 6.98  | 7.56  |
| Hoxb7 ///  | 5.30   | 5.54   | 5.62   | 8.18  | 6.09  | 6.35  |
| Siglecg    | 8.09   | 6.81   | 6.95   | 9.88  | 8.09  | 8.09  |
| Itga8      | 7.76   | 6.03   | 6.20   | 8.71  | 7.80  | 7.75  |
| Gstk1      | 7.48   | 6.29   | 5.99   | 8.50  | 7.60  | 8.01  |
| Gpc4       | 8.24   | 6.23   | 6.32   | 8.94  | 8.86  | 7.36  |
| Cnn1       | 11.48  | 9.18   | 9.31   | 10.80 | 11.43 | 12.11 |
| Gli2       | 6.15   | 5.20   | 4.92   | 8.45  | 6.40  | 5.96  |
| Cxcl12     | 7.76   | 8.04   | 7.93   | 11.38 | 9.01  | 7.88  |
| Prdx2      | 5.63   | 6.59   | 6.55   | 8.06  | 7.61  | 7.68  |
| Adam23 /// | 5.98   | 6.69   | 6.68   | 8.78  | 7.26  | 8.17  |
| 2610305D13 | 7.85   | 5.59   | 5.27   | 7.63  | 7.49  | 8.49  |
| Al747699   | 8.36   | 6.74   | 6.51   | 8.73  | 8.79  | 9.03  |
| Fam13c     | 6.48   | 4.93   | 5.00   | 8.23  | 6.23  | 6.88  |
| Col6a3     | 10.94  | 8.65   | 8.42   | 11.29 | 10.75 | 10.97 |
| H60a       | 7.51   | 6.56   | 6.58   | 9.64  | 7.91  | 8.20  |
| Adam23     | 5.00   | 5.67   | 5.52   | 7.64  | 6.32  | 7.41  |
| Ptn        | 4.77   | 4.60   | 4.24   | 9.05  | 4.54  | 5.26  |
| Npy1r      | 6.09   | 5.68   | 5.96   | 8.42  | 7.05  | 7.54  |
| Nsg1       | 6.93   | 7.00   | 6.70   | 10.64 | 7.63  | 7.76  |
| Kcnmb1     | 6.81   | 4.95   | 5.44   | 7.29  | 7.21  | 8.20  |
| Cd200r4    | 5.97   | 2.97   | 3.24   | 2.93  | 7.21  | 7.60  |
| Sema3a     | 4.50   | 4.92   | 4.60   | 8.31  | 5.54  | 5.90  |
| Ppp1r14a   | 5.94   | 4.19   | 3.89   | 7.04  | 6.87  | 6.16  |
| Tbx18      | 4.06   | 5.32   | 5.52   | 8.79  | 6.09  | 6.29  |
| Ptprz1     | 6.19   | 4.16   | 4.30   | 7.98  | 6.10  | 6.95  |
| Ltbp1      | 7.99   | 8.10   | 8.14   | 11.39 | 9.81  | 9.58  |
| Prelp      | 7.29   | 4.54   | 4.81   | 9.46  | 6.51  | 7.48  |
| Myh11      | 9.44   | 7.04   | 7.13   | 9.53  | 10.54 | 11.17 |
| B230214O09 | 7.71   | 2.99   | 3.55   | 8.88  | 8.13  | 7.39  |
| Xist       | 2.99   | 2.31   | 2.54   | 9.60  | 9.69  | 2.65  |
